# Supplementary material
Source: ML conference proceedings conference paper supplement (https://openreview.net/forum?id=HLhi9xhRw6)

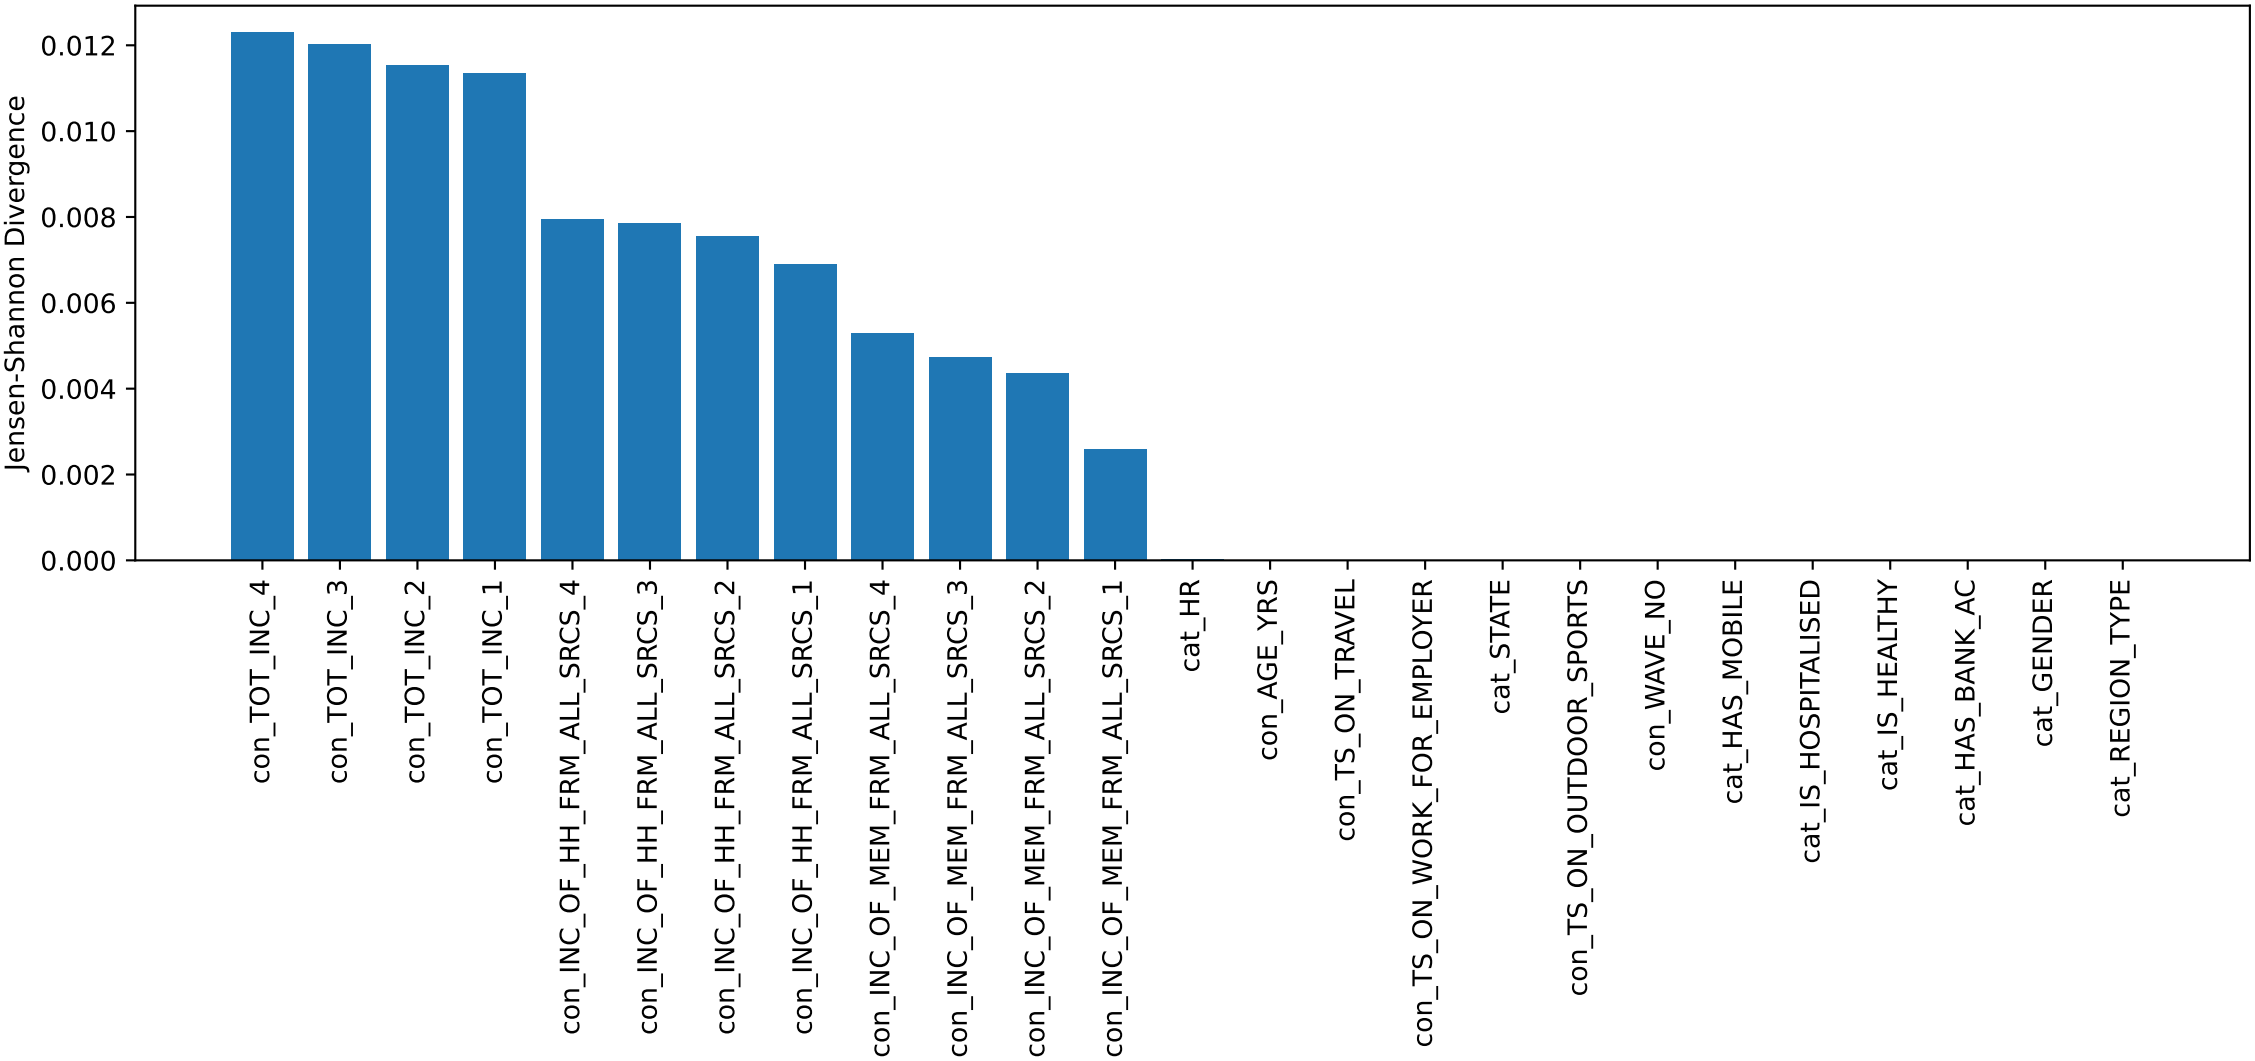

Supplement: supplementary_material [file js_divergence_plot_CPHS_vs_SynthCPHS.pdf › Supplementary_material/Experiment_result/Distribution_similarity_test/js_divergence_plot_CPHS_vs_SynthCPHS.pdf]

JS Divergence between Real and Synthetic Data (per Variable)

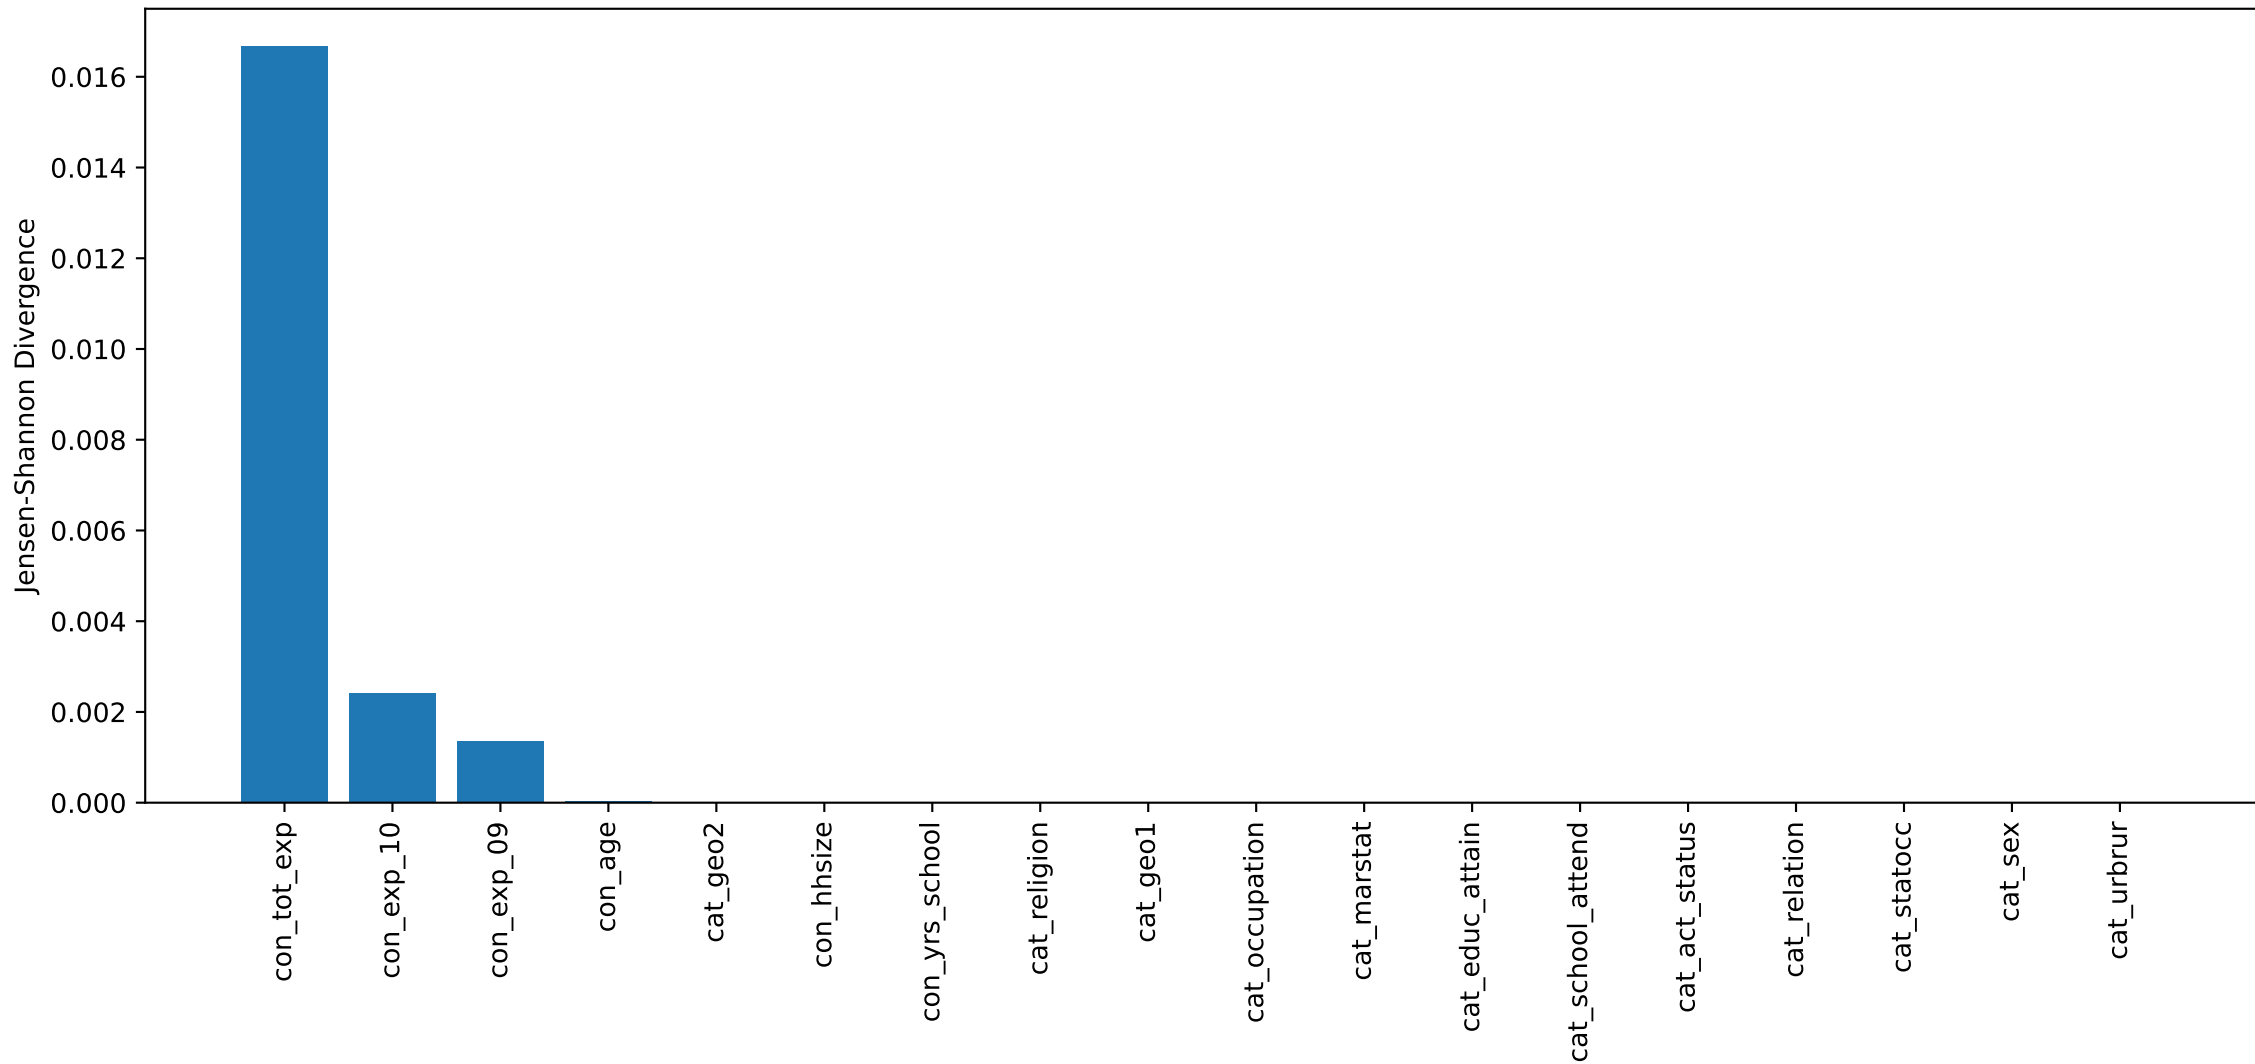

Supplement: supplementary_material [file js_divergence_plot_SubSDIC_vs_SDIC.pdf › Supplementary_material/Experiment_result/Distribution_similarity_test/js_divergence_plot_SubSDIC_vs_SDIC.pdf]

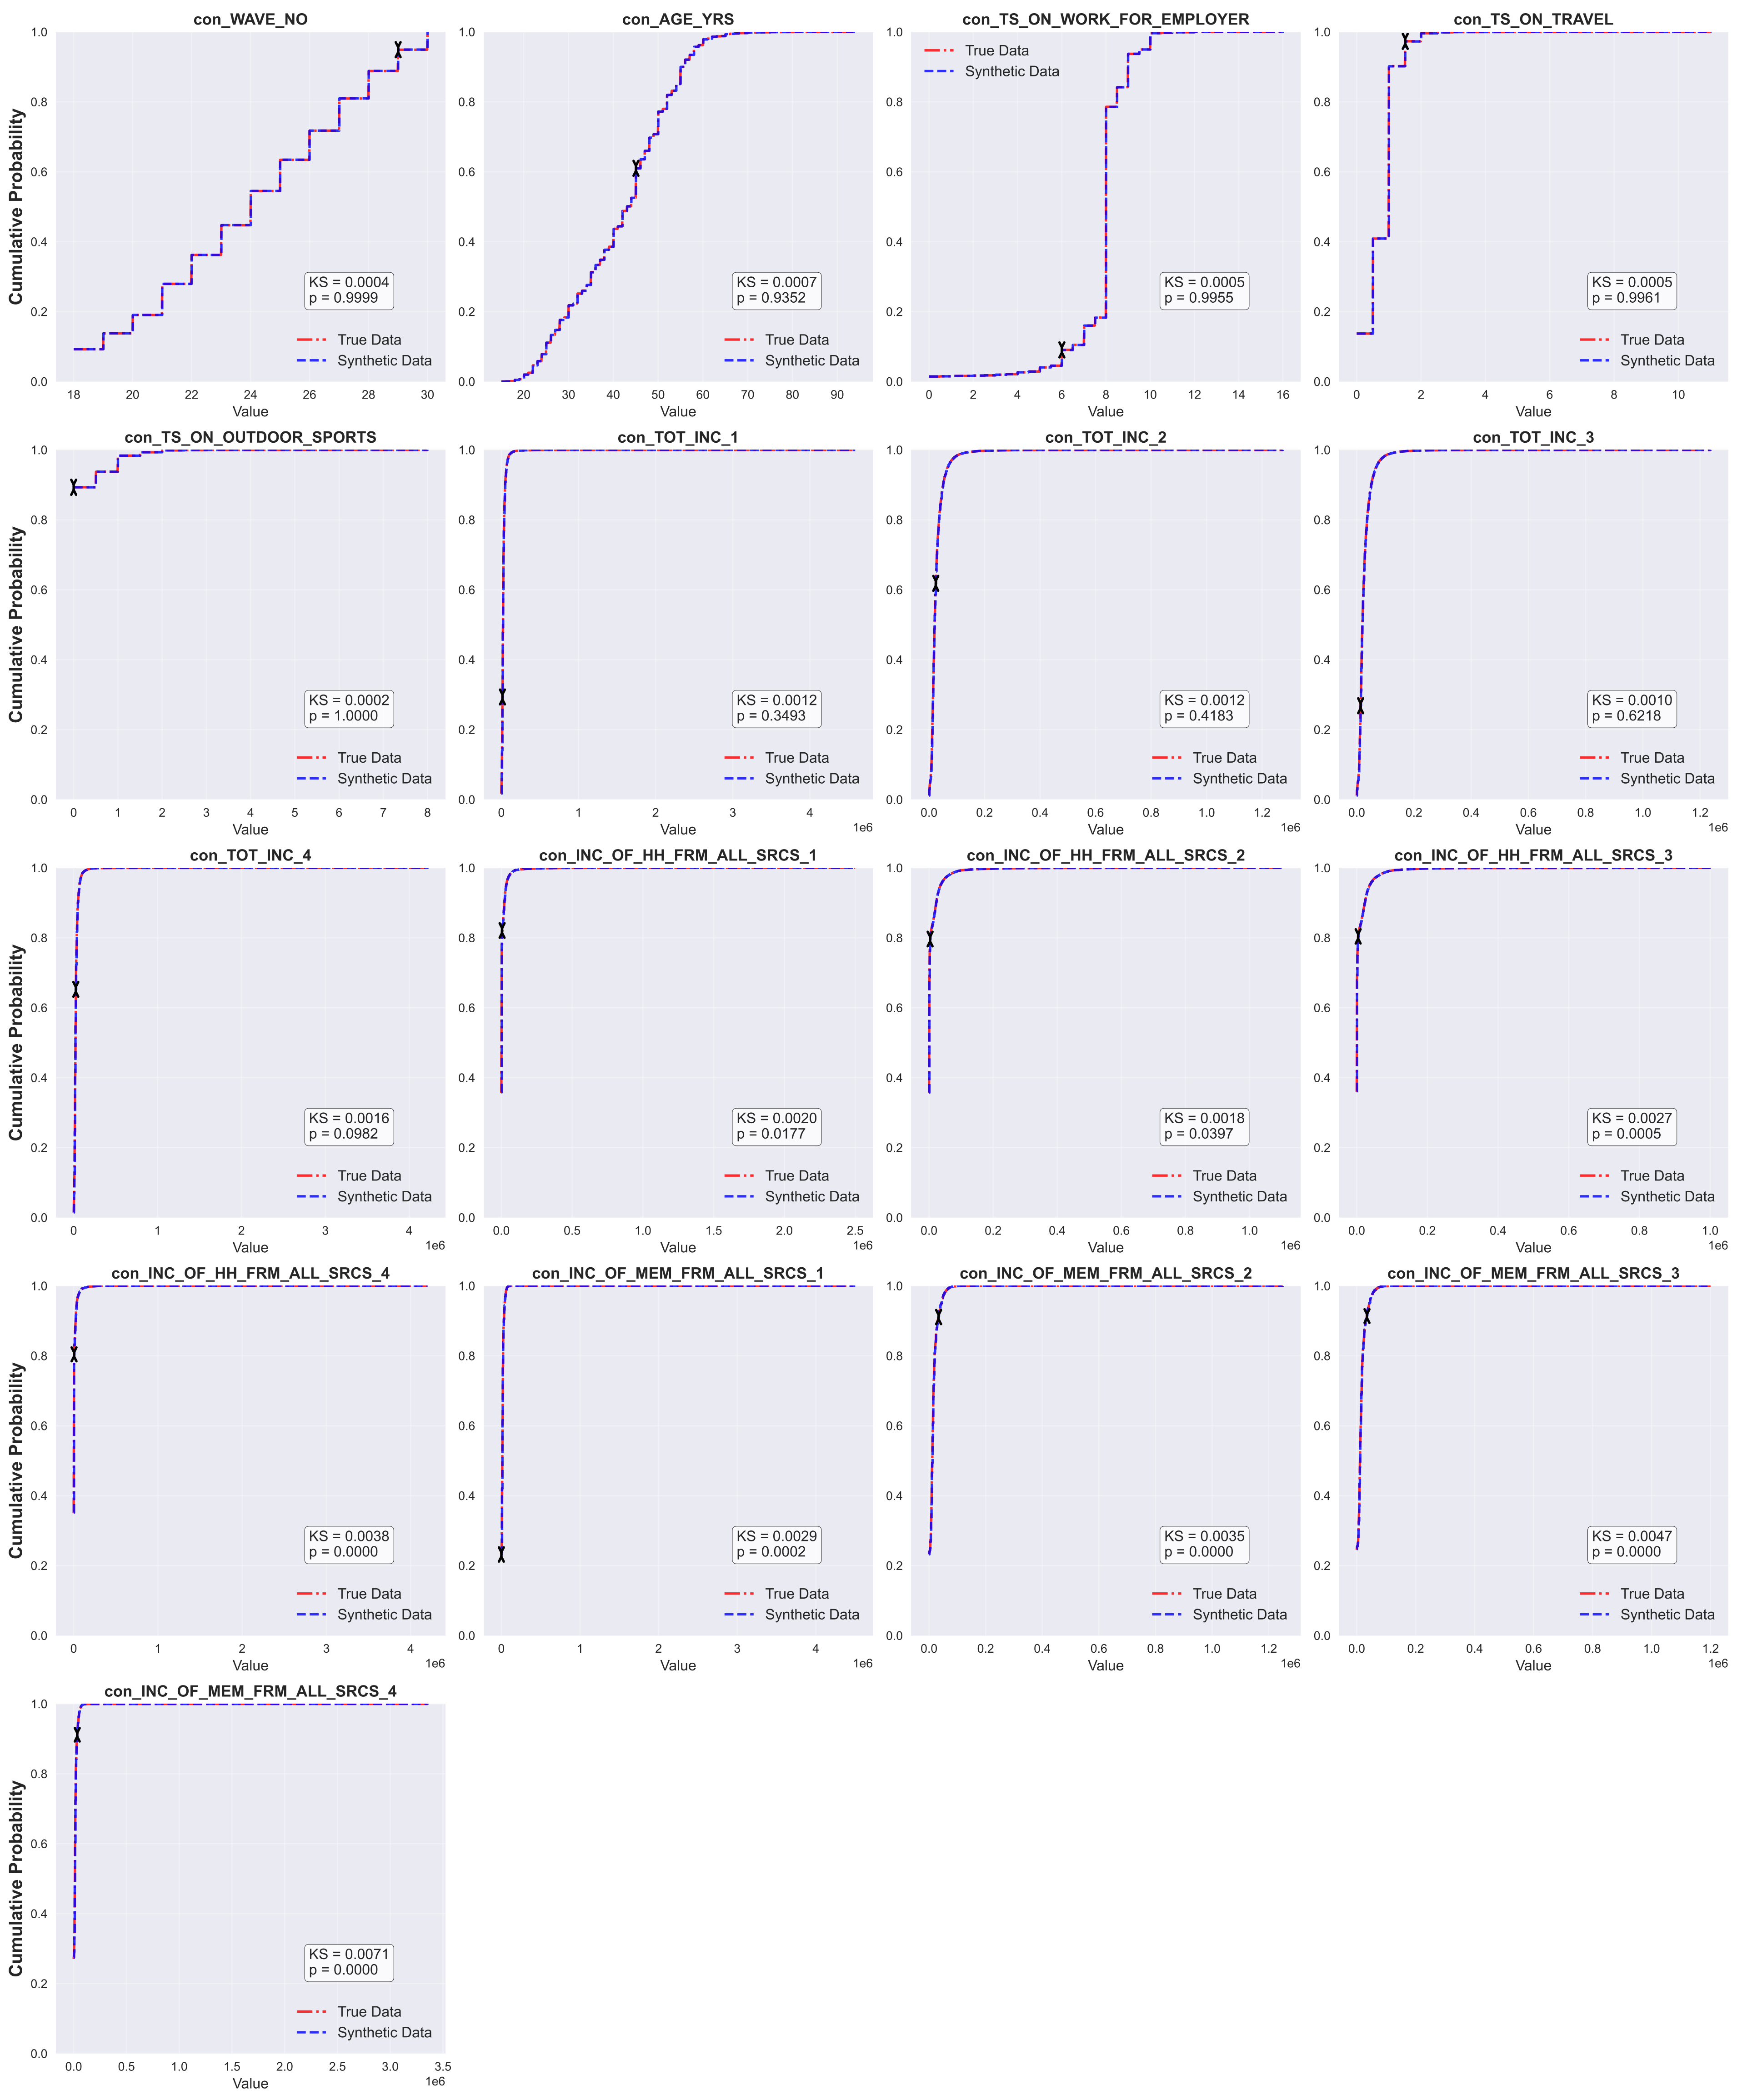

Supplement: supplementary_material [file ks_test_continuous_variables_CPHS_vs_SynthCPHS.pdf › Supplementary_material/Experiment_result/Distribution_similarity_test/ks_test_continuous_variables_CPHS_vs_SynthCPHS.pdf]

# Kolmogorov-Smirnov Test: SDIC vs SubSDIC Data CDFs

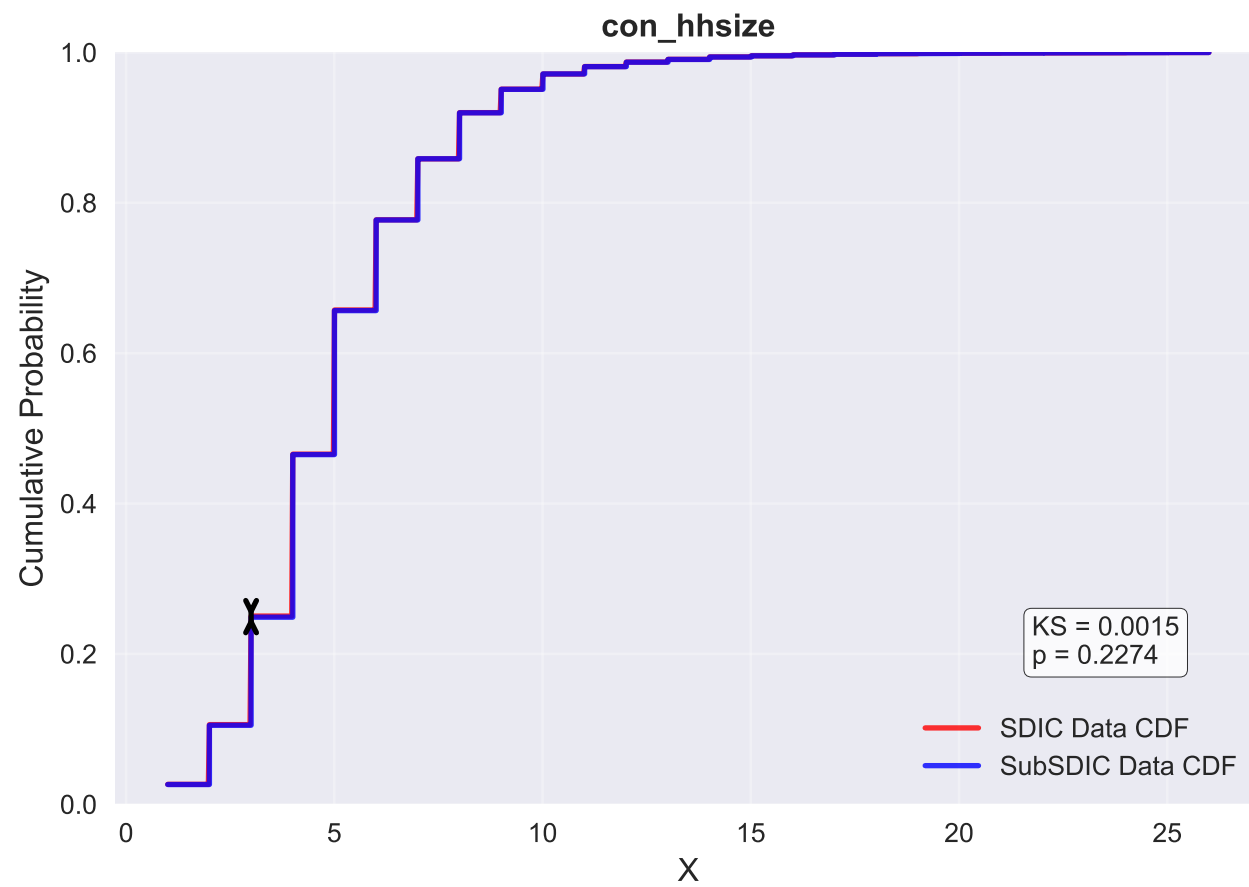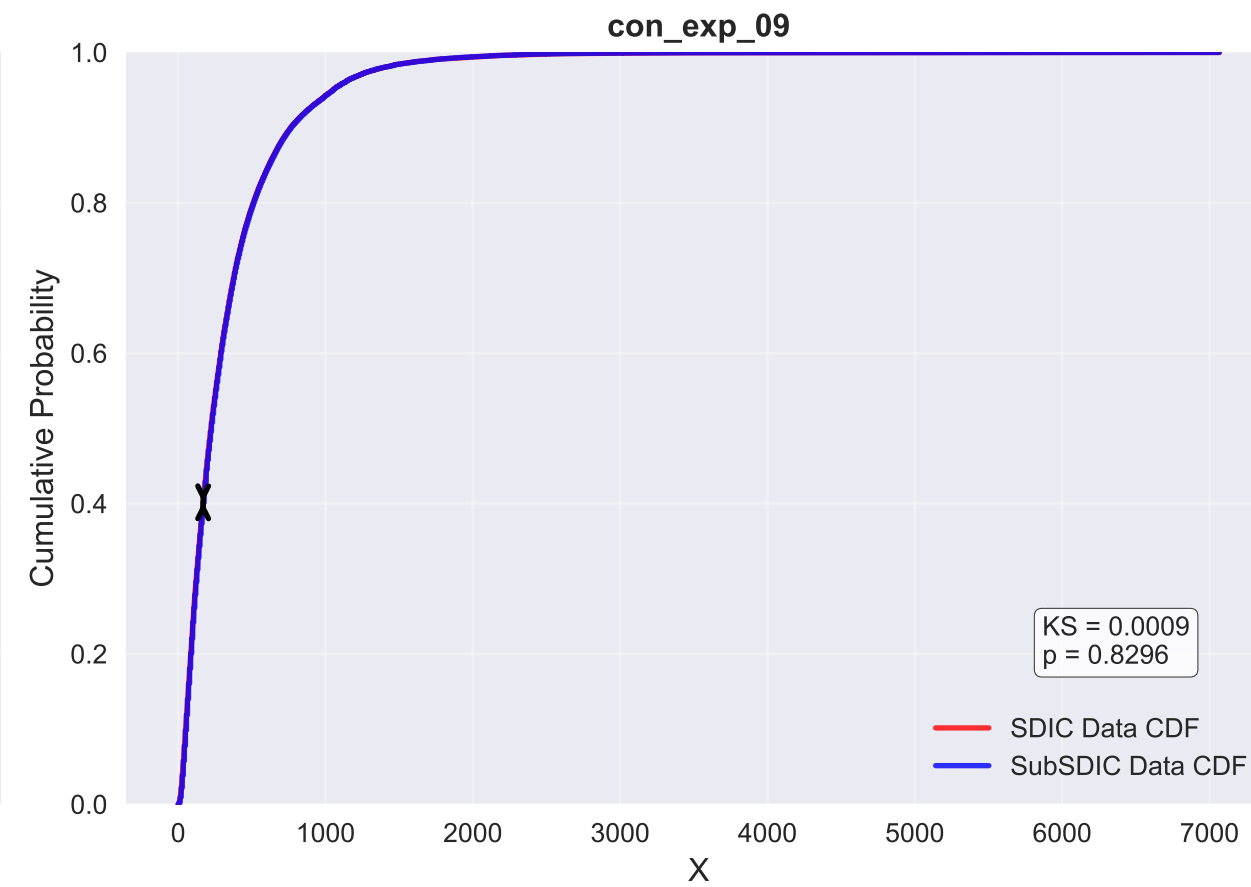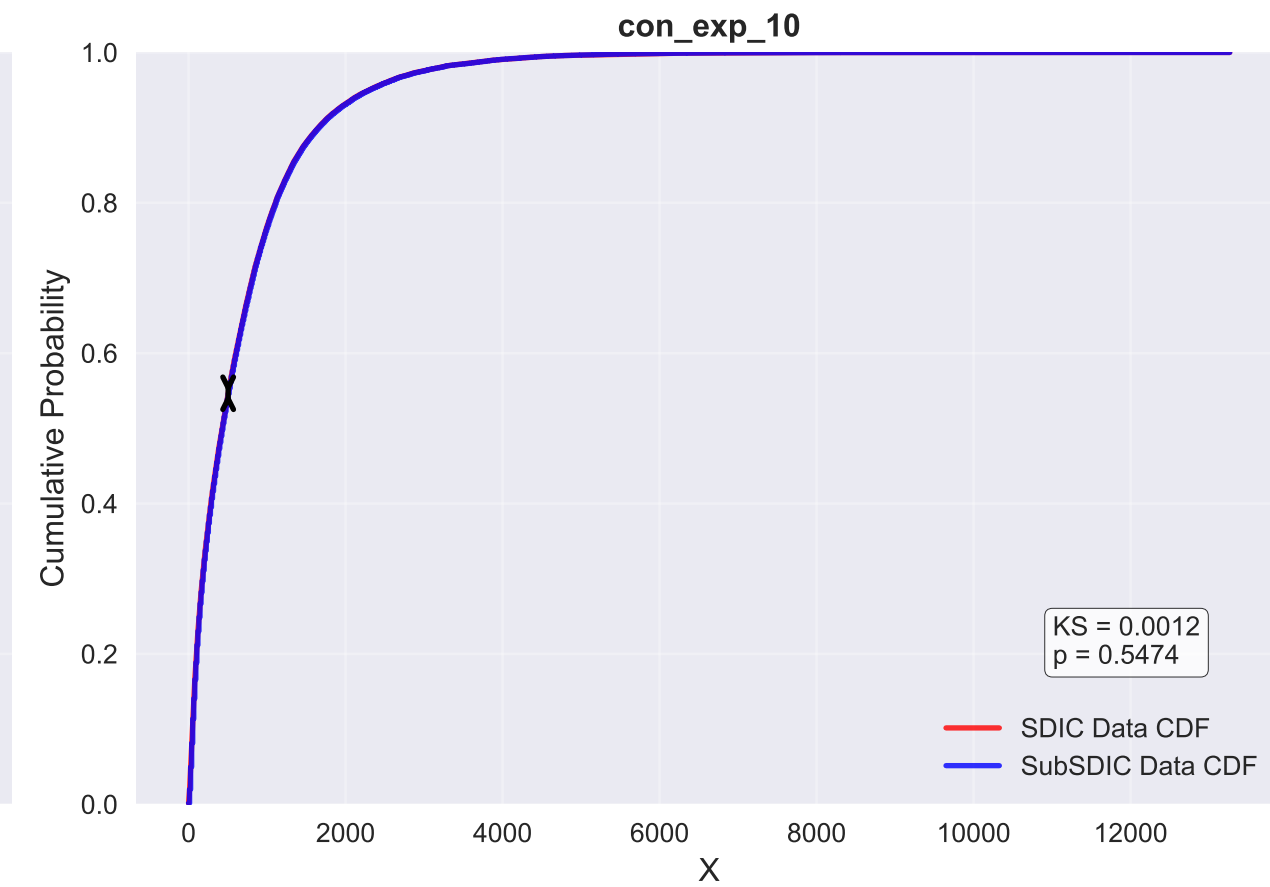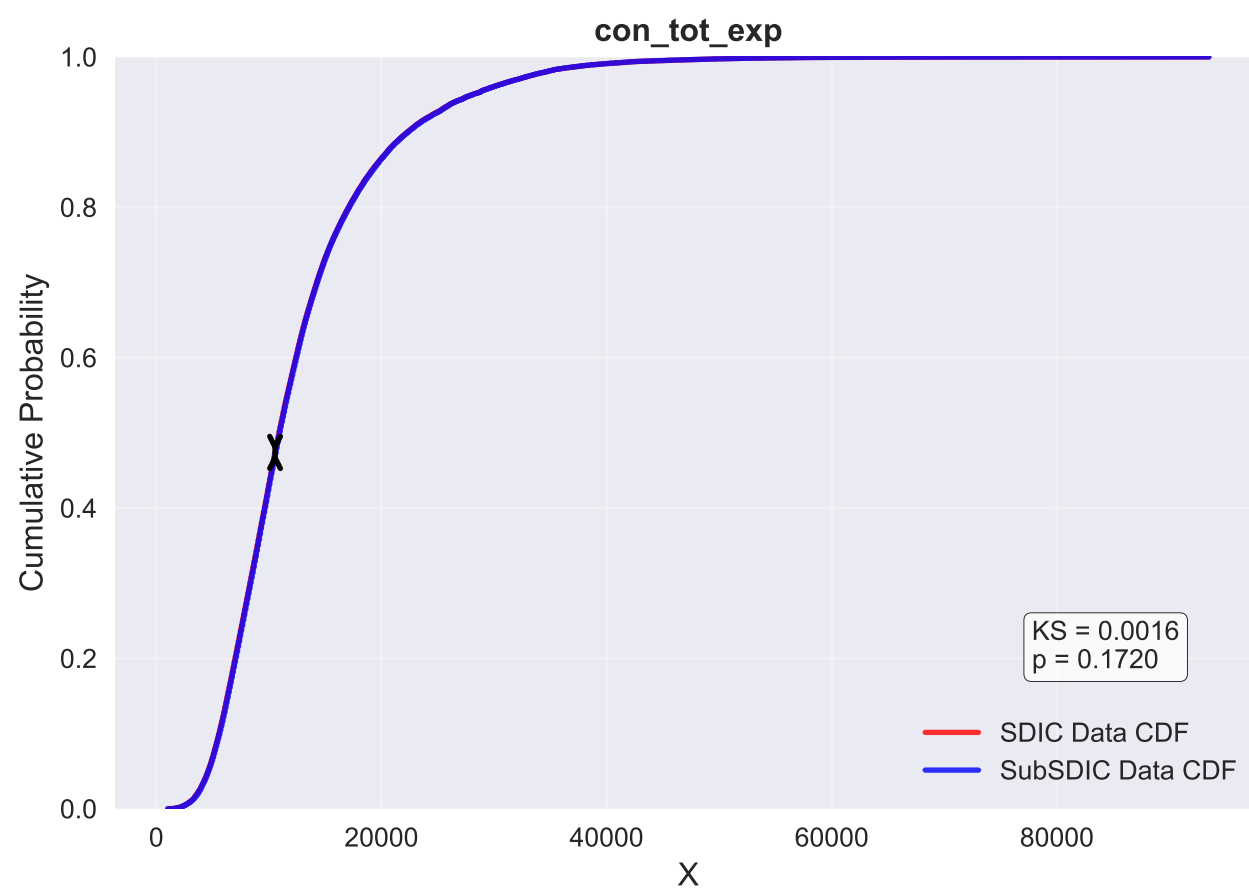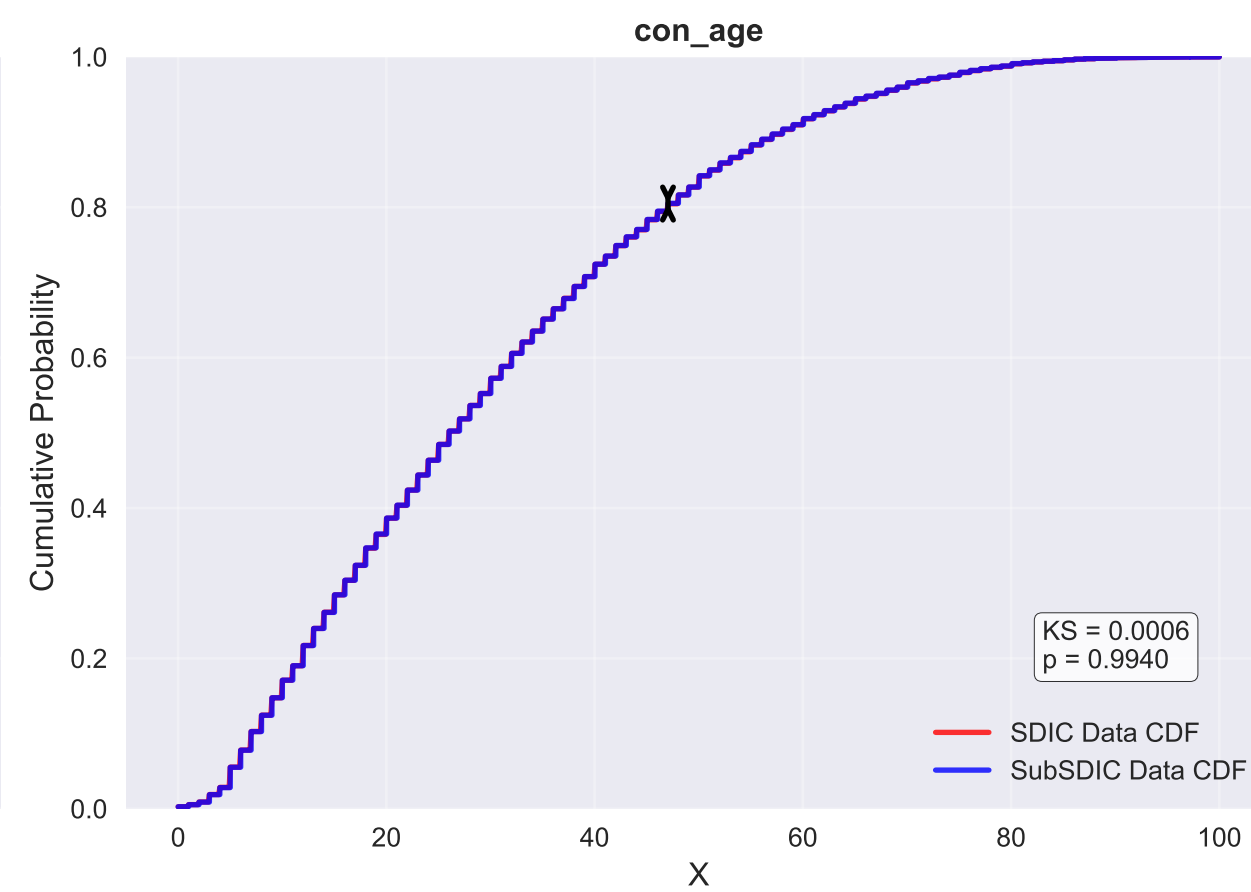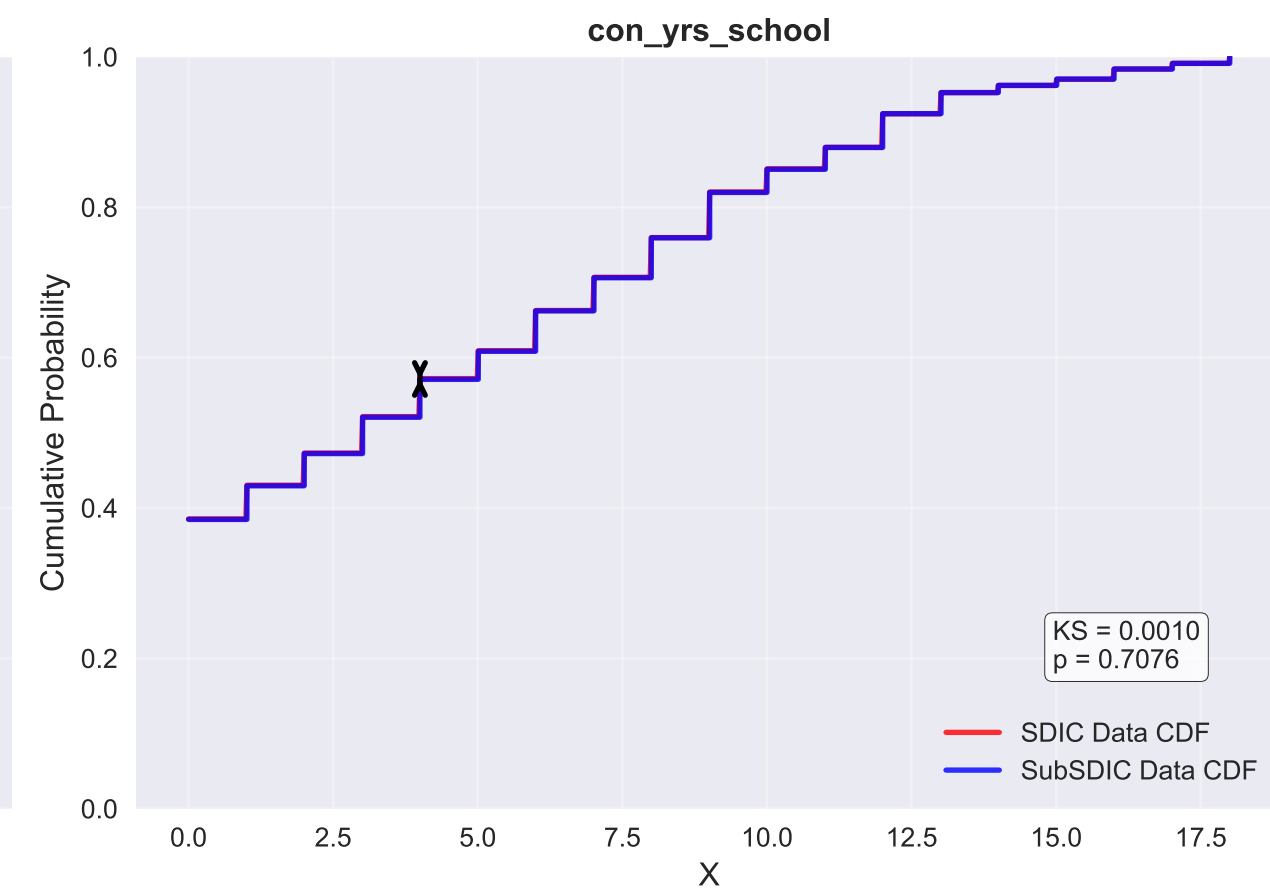

Supplement: supplementary_material [file ks_test_continuous_variables_SubSDIC_vs_SDIC.pdf › Supplementary_material/Experiment_result/Distribution_similarity_test/ks_test_continuous_variables_SubSDIC_vs_SDIC.pdf]
